# Supplementary material
Source: Research Square preprint supplement (doi:10.21203/rs.3.rs-10072761/v1)
Supplement: Supplementary file 1 [file 4feb4b8c9bbb5737a63d8f21.docx]

|  | | **Short Sleepers (≤ 6h)** | | | **Normal Sleepers (7-8h)** | | | **Long Sleepers (≥ 9h)** | | |
| --- | --- | --- | --- | --- | --- | --- | --- | --- | --- | --- |
| **Group**1 | **Characteristic**1 | **HR**1 | **95% CI**1 | **p-value**1 | **HR**1 | **95% CI**1 | **p-value**1 | **HR**1 | **95% CI**1 | **p-value**1 |
| Substituting 30m of TV Viewing with: | → to Sleep | 0.94 | 0.91, 0.96 | **<0.001** | 0.99 | 0.95, 1.02 | 0.4 | 1.07 | 1.03, 1.10 | **<0.001** |
|  | → to MVPA | 0.97 | 0.95, 0.98 | **<0.001** | 0.97 | 0.96, 0.99 | **<0.001** | 0.97 | 0.93, 1.00 | **0.039** |
| Substituting 30m of Sleep with: | → to TV Viewing | 1.07 | 1.04, 1.10 | **<0.001** | 1.01 | 0.98, 1.05 | 0.4 | 0.94 | 0.91, 0.97 | **<0.001** |
|  | → to MVPA | 1.04 | 1.00, 1.07 | **0.027** | 0.99 | 0.95, 1.02 | 0.4 | 0.91 | 0.87, 0.94 | **<0.001** |
| Substituting 30m of MVPA with: | → to TV Viewing | 1.03 | 1.02, 1.05 | **<0.001** | 1.03 | 1.02, 1.04 | **<0.001** | 1.04 | 1.00, 1.07 | **0.039** |
|  | → to Sleep | 0.97 | 0.94, 1.00 | **0.027** | 1.01 | 0.98, 1.05 | 0.4 | 1.10 | 1.06, 1.15 | **<0.001** |
| 1SHR < 1 indicates a protective effect against MACE. All models account for non-cardiovascular death as a competing risk and are adjusted for relevant covariates. | | | | | | | | | | |
| Abbreviations: CI = Confidence Interval, HR = Hazard Ratio | | | | | | | | | | |

**Supplementary Table S3.** Sensitivity analysis of isotemporal substitution of movement behaviors using Fine-Gray competing risk models.*Note:* Data are presented as Subdistribution Hazard Ratios (SHR) and 95% Confidence Intervals (CI). To account for the potential bias introduced by participants who died from non-cardiovascular causes prior to experiencing a MACE, Fine-Gray proportional subdistribution hazards models were utilized. The estimates represent the theoretical impact on the risk of incident Major Adverse Cardiovascular Events (MACE) when reallocating 30 minutes per day from one baseline behavior to another, holding the total duration of interacting behaviors constant. Analyses were stratified by short (≤6 h/day), normal (7-8 h/day), and long (≥9 h/day) baseline sleep phenotypes. All models were adjusted for age at recruitment, sex, Townsend Deprivation Index, body mass index (BMI), smoking status, and alcohol frequency. An SHR < 1.0 indicates a protective effect against MACE. *Abbreviations:* CI, Confidence Interval; MACE, Major Adverse Cardiovascular Events; MVPA, Moderate-to-Vigorous Physical Activity; SHR, Subdistribution Hazard Ratio; TV, Television.
