# Supplementary material
Source: Research Square preprint supplement (doi:10.21203/rs.3.rs-10072761/v1)
Supplement: Supplementary file 2 [file 737673e4c9fa5d932974d93e.docx]

| **Male** | | **Short Sleepers (<=6h)** | | | | **Normal Sleepers (7-8h)** | | | **Long Sleepers (>=9h)** | |
| --- | --- | --- | --- | --- | --- | --- | --- | --- | --- | --- |
| **Group** | **Characteristic** | **HR** **(95% CI)** | | **p-value** | | **HR** **(95% CI)** | | **p-value** | **HR** **(95% CI)** | **p-value** |
| Substituting 30m of TV with: | -> Sleep | 0.94 (0.91 to 0.98) | | **0.004** | | 1.01 (0.97 to 1.05) | | 0.73 | 1.06 (1.01 to 1.10) | **0.009** |
|  | -> MVPA | 0.97 (0.96 to 0.99) | | **<0.001** | | 0.98 (0.97 to 0.99) | | **0.004** | 0.97 (0.94 to 1.00) | 0.080 |
| Substituting 30m of Sleep with: | -> TV | 1.06 (1.02 to 1.10) | | **0.004** | | 0.99 (0.95 to 1.04) | | 0.73 | 0.95 (0.91 to 0.99) | **0.009** |
|  | -> MVPA | 1.03 (0.99 to 1.07) | | 0.16 | | 0.97 (0.93 to 1.01) | | 0.20 | 0.92 (0.88 to 0.96) | **<0.001** |
| Substituting 30m of MVPA with: | -> TV | 1.03 (1.01 to 1.04) | | **<0.001** | | 1.02 (1.01 to 1.03) | | **0.004** | 1.03 (1.00 to 1.06) | 0.080 |
|  | -> Sleep | 0.97 (0.93 to 1.01) | | 0.16 | | 1.03 (0.99 to 1.07) | | 0.20 | 1.09 (1.04 to 1.14) | **<0.001** |
| Abbreviations: CI = Confidence Interval, HR = Hazard Ratio | | | | | | | | | | |
| **Female** | | **Short Sleepers (<=6h)** | | | **Normal Sleepers (7-8h)** | | | | **Long Sleepers (>=9h)** | |
| **Group** | **Characteristic** | **HR** **(95% CI)** | **p-value** | | **HR** **(95% CI)** | | **p-value** | | **HR** **(95% CI)** | **p-value** |
| Substituting 30m of TV with: | -> Sleep | 0.91 (0.86 to 0.95) | **<0.001** | | 0.96 (0.90 to 1.01) | | 0.14 | | 1.09 (1.03 to 1.15) | **0.004** |
|  | -> MVPA | 0.94 (0.91 to 0.97) | **<0.001** | | 0.94 (0.91 to 0.96) | | **<0.001** | | 0.94 (0.88 to 0.99) | **0.030** |
| Substituting 30m of Sleep with: | -> TV | 1.10 (1.05 to 1.16) | **<0.001** | | 1.05 (0.99 to 1.11) | | 0.14 | | 0.92 (0.87 to 0.97) | **0.004** |
|  | -> MVPA | 1.04 (0.98 to 1.09) | 0.18 | | 0.98 (0.92 to 1.04) | | 0.46 | | 0.86 (0.80 to 0.92) | **<0.001** |
| Substituting 30m of MVPA with: | -> TV | 1.06 (1.03 to 1.10) | **<0.001** | | 1.07 (1.04 to 1.10) | | **<0.001** | | 1.07 (1.01 to 1.13) | **0.030** |
|  | -> Sleep | 0.96 (0.91 to 1.02) | 0.18 | | 1.02 (0.96 to 1.09) | | 0.46 | | 1.16 (1.08 to 1.25) | **<0.001** |
| Abbreviations: CI = Confidence Interval, HR = Hazard Ratio | | | | | | | | | | |

**Supplementary Table S2.** Isotemporal substitution analysis of 24-hour movement behaviors and incident MACE, stratified by sex and sleep phenotype. *Note:* Data are presented as Hazard Ratios (HR) and 95% Confidence Intervals (CI). The estimates represent the theoretical impact on the risk of incident Major Adverse Cardiovascular Events (MACE) when reallocating 30 minutes per day from one baseline behavior to another, while holding the total duration of interacting behaviors constant. Analyses were performed separately for male and female participants, and further stratified by short (≤6 h/day), normal (7-8 h/day), and long (≥9 h/day) baseline sleep phenotypes. All Cox proportional hazards models were adjusted for age at recruitment, Townsend Deprivation Index, body mass index (BMI), smoking status, and alcohol frequency. *Abbreviations:* CI, Confidence Interval; HR, Hazard Ratio; MACE, Major Adverse Cardiovascular Events; MVPA, Moderate-to-Vigorous Physical Activity; TV, Television.
