# Supplementary material
Source: Research Square preprint supplement (doi:10.21203/rs.3.rs-10072761/v1)
Supplement: Supplementary file 4 [file 8fbd7a470f50d902b0c59821.docx]

|  | | **Short Sleepers (≤ 6h)** | | | **Normal Sleepers (7-8h)** | | | **Long Sleepers (≥ 9h)** | | |
| --- | --- | --- | --- | --- | --- | --- | --- | --- | --- | --- |
| **Group**1 | **Characteristic**1 | **HR**1 | **95% CI**1 | **p-value**1 | **HR**1 | **95% CI**1 | **p-value**1 | **HR**1 | **95% CI**1 | **p-value**1 |
| Substituting 30m of TV Viewing with: | → to Sleep | 0.93 | 0.90, 0.96 | **<0.001** | 0.97 | 0.94, 1.01 | 0.12 | 1.08 | 1.04, 1.12 | **<0.001** |
|  | → to MVPA | 0.97 | 0.95, 0.98 | **<0.001** | 0.97 | 0.96, 0.98 | **<0.001** | 0.97 | 0.95, 1.00 | 0.088 |
| Substituting 30m of Sleep with: | → to TV Viewing | 1.08 | 1.04, 1.11 | **<0.001** | 1.03 | 0.99, 1.07 | 0.12 | 0.93 | 0.90, 0.96 | **<0.001** |
|  | → to MVPA | 1.04 | 1.01, 1.08 | **0.013** | 1.00 | 0.96, 1.03 | 0.9 | 0.90 | 0.87, 0.94 | **<0.001** |
| Substituting 30m of MVPA with: | → to TV Viewing | 1.03 | 1.02, 1.05 | **<0.001** | 1.03 | 1.02, 1.04 | **<0.001** | 1.03 | 1.00, 1.06 | 0.088 |
|  | → to Sleep | 0.96 | 0.93, 0.99 | **0.013** | 1.00 | 0.97, 1.04 | 0.9 | 1.11 | 1.07, 1.15 | **<0.001** |
| 1HR < 1 indicates a protective effect against MACE. All models are adjusted for relevant covariates. | | | | | | | | | | |
| Abbreviations: CI = Confidence Interval, HR = Hazard Ratio | | | | | | | | | | |

**Supplementary Table S4.** Sensitivity analysis of isotemporal substitution of 24-hour movement behaviors and incident MACE, excluding events within the first 2 years of follow-up. *Note:* Data are presented as Hazard Ratios (HR) and 95% Confidence Intervals (CI). To minimize potential reverse causality, participants who experienced a Major Adverse Cardiovascular Event (MACE) within the first 2 years of follow-up were excluded from this analysis. The estimates represent the theoretical impact on the risk of incident MACE when reallocating 30 minutes per day from one baseline behavior to another, while holding the total duration of interacting behaviors constant. Analyses were stratified by short (≤6 h/day), normal (7-8 h/day), and long (≥9 h/day) baseline sleep phenotypes. All Cox proportional hazards models were adjusted for age at recruitment, sex, Townsend Deprivation Index, body mass index (BMI), smoking status, and alcohol frequency. An HR < 1.0 indicates a protective effect against MACE. *Abbreviations:* CI, Confidence Interval; HR, Hazard Ratio; MACE, Major Adverse Cardiovascular Events; MVPA, Moderate-to-Vigorous Physical Activity; TV, Television.
